# Supplementary material for: Flexpart v10.1 simulation of source contributions to Arctic black carbon
Source: Copernicus journal article supplement (doi:10.5194/acp-2019-590), 2019-09-24
Supplement: Supplementary file 1 [file acp-2019-590-supplement.pdf]

707 Supplementary materials for

708 **Flexpart v10.1 simulation of source contributions to Arctic black carbon**

709 Chunmao Zhu<sup>1</sup>, Yugo Kanaya<sup>1,2</sup>, Masayuki Takigawa<sup>1,2</sup>, Kohei Ikeda<sup>3</sup>, Hiroshi Tanimoto<sup>3</sup>,

710 Fumikazu Taketani<sup>1,2</sup>, Takuma Miyakawa<sup>1,2</sup>, Hideki Kobayashi<sup>1,2</sup>, Ignacio Pissso<sup>4</sup>

711

712 <sup>1</sup>Research Institute for Global Change, Japan Agency for Marine–Earth Science and

713 Technology (JAMSTEC), Yokohama 2360001, Japan

714 <sup>2</sup>Institute of Arctic Climate and Environmental Research, Japan Agency for Marine–Earth

715 Science and Technology, Yokohama 2360001, Japan

716 <sup>3</sup>National Institute for Environmental Studies, Tsukuba 305-8506, Japan

717 <sup>4</sup>NILU – Norwegian Institute for Air Research, Kjeller 2027, Norway

718

719 Correspondence to Chunmao Zhu (chmzhu@jamstec.go.jp)

720

721

722 This file contains Figures S1, Figure S2, and Figure S3.

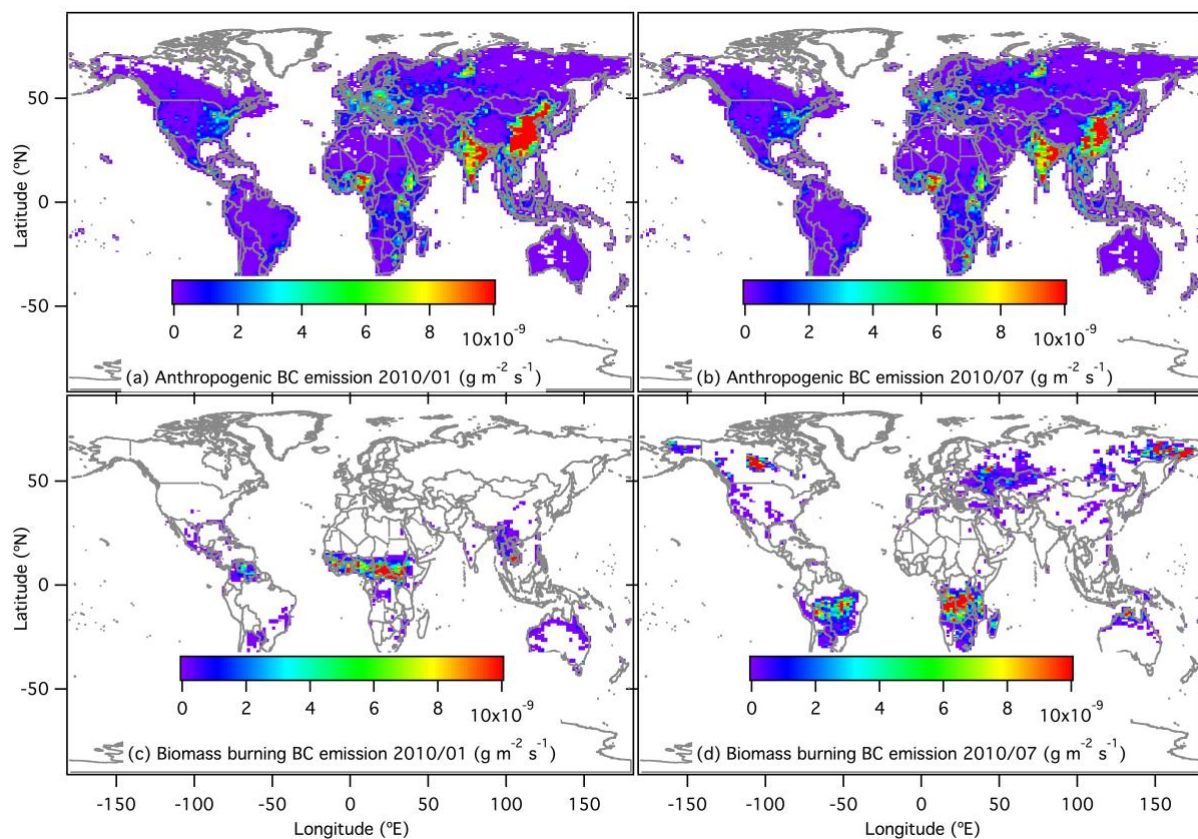

723  
724 Figure S1. Spatial distributions of BC emissions from (a) anthropogenic sources in January  
725 2010, (b) anthropogenic sources in July 2010, (c) biomass burning in January 2010, and (d)  
726 biomass burning in July 2010.  
727

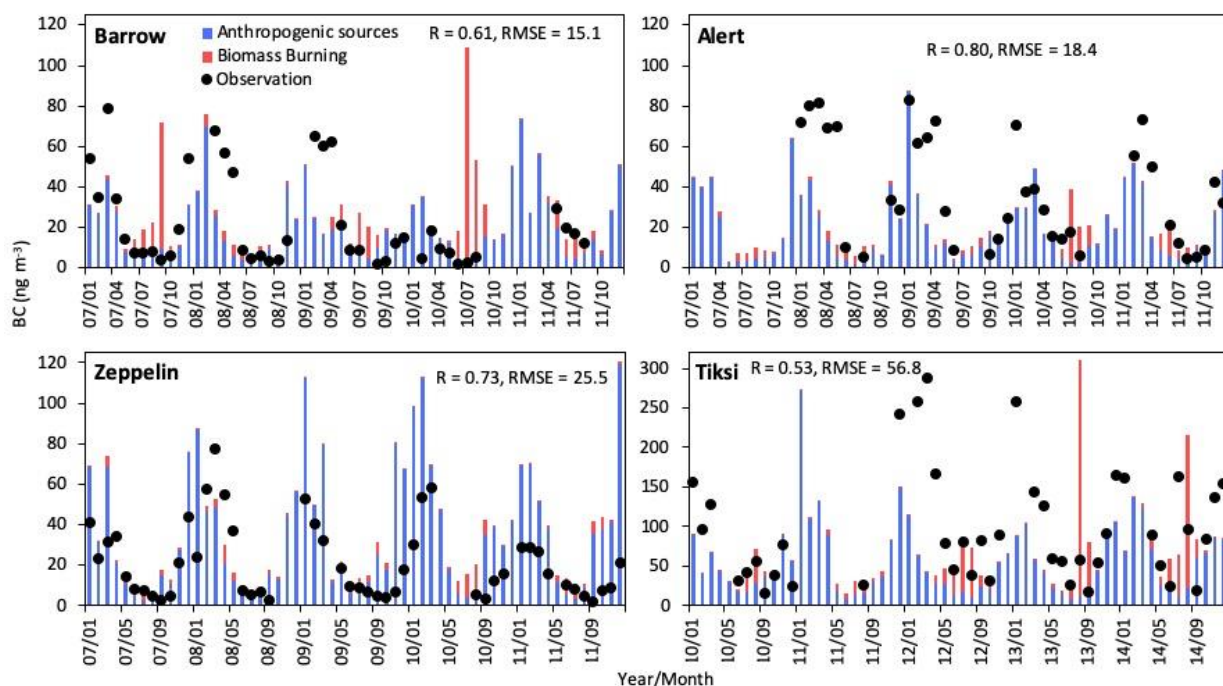

728  
 729 Figure S2. Time series of observed (filled circles) and modeled (bars) seasonal variations in BC  
 730 mass concentrations at Arctic sites. Contributions from anthropogenic sources (blue) and  
 731 biomass burning (red) in each month are shown. Monthly averages of observed (filled circles)  
 732 and simulated (bars) BC are shown for 2007–2011 at Barrow, USA (156.6° W, 71.3° N), Alert,  
 733 Canada (62.3° W, 82.5° N), and Zeppelin, Norway (11.9° E, 78.9° N), and for 2010–2014 at  
 734 Tiksi, Russia (128.9° E, 71.6° N).  $R$  and RMSE indicate correlation coefficient and root-mean-  
 735 square error ( $\text{ng m}^{-3}$ ), respectively.  
 736

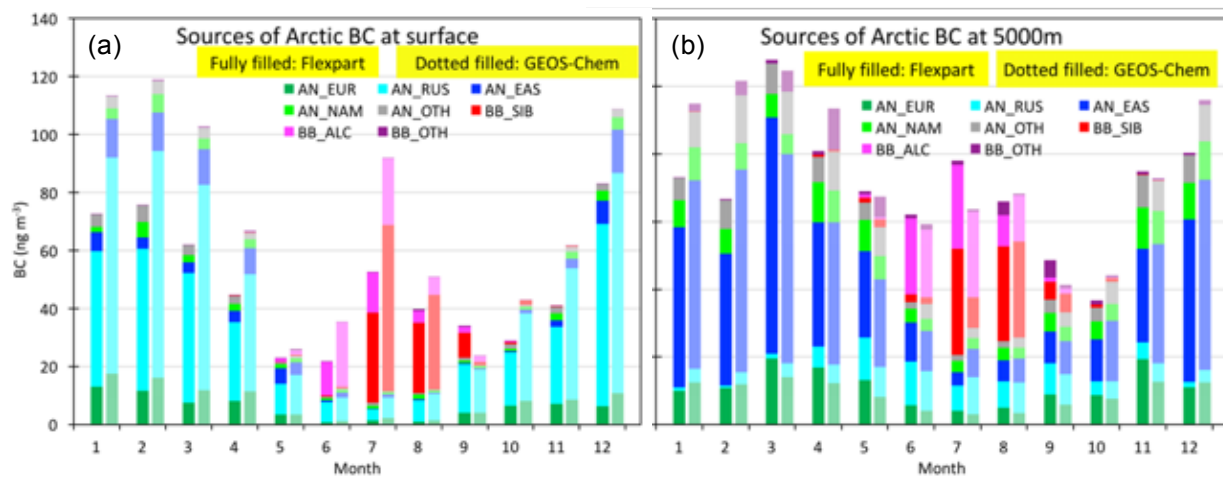

737

738 Figure S3. Comparison of Flexpart-simulated Arctic BC sources with those obtained by using  
 739 GEOS-Chem.

740
